# Supplementary material for: Hyperglycemia aggravates monocyte-endothelial adhesion in human umbilical vein endothelial cells from women with gestational diabetes mellitus by inducing Cx43 overexpression
Source: PubMed Central journal article supplement — Ann Transl Med. 2021 Feb;9(3):234. doi: 10.21037/atm-19-4738 (PMC7940931; doi:10.21037/atm-19-4738), 2021-02
Supplement: atm-09-03-234-supplementary.pdf [file atm-09-03-234-supplementary.pdf]

**Methods of electrophoretic mobility shift assay**

Nuclear extract was prepared from HUVECs using Nuclear and Cytoplasmic Protein Extraction Kit (keyGEN BioTECH, Nanjing, CN). The probes targeting ICAM-1 or VCAM-1 consensus sequences were biotin-labeled using Light Shift Chemiluminescent EMSA kit (Gzscbio, Guangzhou, CN). Binding assays were performed in 20  $\mu$ L of reaction mixture system containing 2  $\mu$ L of HUVECs lysate, 5 mM MgCl<sub>2</sub>, 2.5% Glycerol, 0.05% NP-40, 50 ng/ $\mu$ L of poly(dI·dC) and 20 fmol labeled probes for 20 minutes at 37 °C. Reactions were analyzed by electrophoresis on a 6% Native-PAGE at 100 V, and transferred onto Nitrocellulose Membrane (Invitrogen). Forty minutes, after transfer, the membrane was immediately cross-linked by UV-light for 15 seconds and the target bands were detected by chemiluminescence (Tanon, Shanghai, CN).

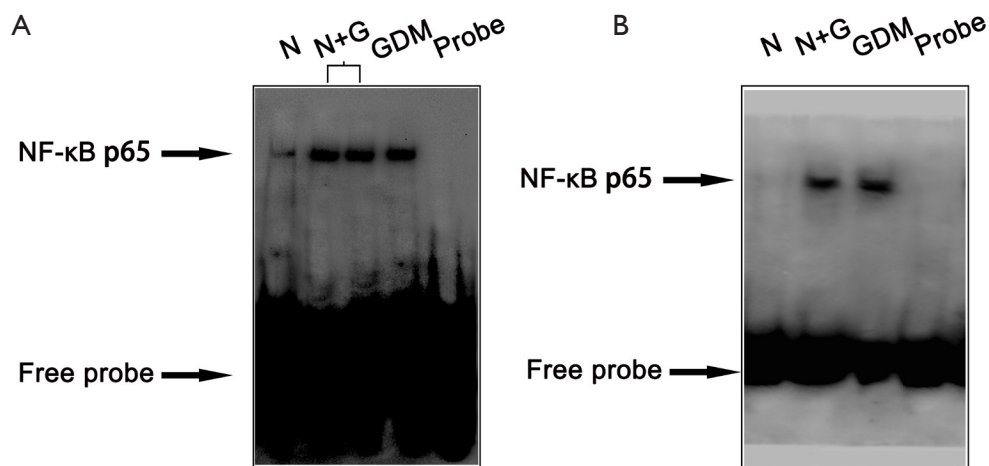

**Figure S1** Combination between NF- $\kappa$ B and the promoter of ICAM-1 or VCAM-1. EMSA was used to detect changes of the combination between NF- $\kappa$ B and the promoters of ICAM-1 or VCAM-1 under different conditions. (A) the combination between NF- $\kappa$ B and the promoter of ICAM-1; (B) the combination between NF- $\kappa$ B and the promoter of VCAM-1. N, normal HUVECs; N + G, normal HUVECs were pretreated with high glucose; GDM, GDM-HUVECs.
